# Supplementary material for: Architecture of a multi-channel and easy-to-make microfluidic paper-based colorimetric device (μPCD) towards selective and sensitive recognition of uric acid by AuNPs: an innovative portable tool for the rapid and low-cost identification of clinically relevant biomolecules
Source: PubMed Central journal article supplement — RSC Adv. 2021 Aug 10;11(44):27298–308. doi: 10.1039/d1ra04764g (PMC9037795; doi:10.1039/d1ra04764g), 2021-08-10
Supplement: RA-011-D1RA04764G-s003.pdf [file RA-011-D1RA04764G-s003.pdf]

## Supporting information

### Architecture of multi-channel and easy-to-make microfluidic paper-based colorimetric device ( $\mu$ PCD) towards selective and sensitive recognition of uric acid by AuNPs: An innovative portable tool for the rapid and low-cost identification of clinically relevant biomolecules

Fatemeh Farshchi <sup>a,b</sup>, Arezoo Saadati <sup>c</sup>, Mohammad Hasanzadeh <sup>b,\*</sup>, Farzad Seidi <sup>a,\*\*</sup>

<sup>a</sup> Jiangsu Co-Innovation Center for Efficient Processing and Utilization of Forest Resources and International Innovation Center for Forest Chemicals and Materials, Nanjing Forestry University, Nanjing 210037, China.

<sup>b</sup> Pharmaceutical Analysis Research Center, Tabriz University of Medical Sciences, Tabriz, Iran.

<sup>c</sup> Drug Applied Research Center, Tabriz University of Medical Sciences, Tabriz, Iran.

#### Corresponding Author

\* (Mohammad Hasanzadeh) Pharmaceutical Analysis Research Center, Tabriz University of Medical Sciences, Tabriz, Iran.

E-mail address: (\*) [hasanzadehm@tbzmed.ac.ir](mailto:hasanzadehm@tbzmed.ac.ir)

\*\* (Farzad Seidi) Jiangsu Co-Innovation Center for Efficient Processing and Utilization of Forest Resources and International Innovation Center for Forest Chemicals and Materials, Nanjing Forestry University, Nanjing 210037, China E-mail address: (\*\*) [f\\_seidi@njfu.edu.cn](mailto:f_seidi@njfu.edu.cn)

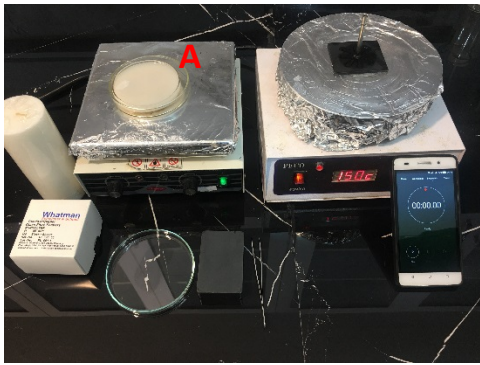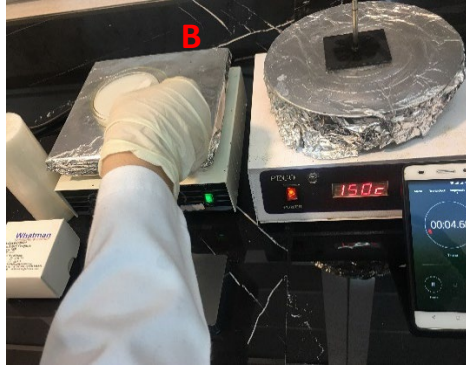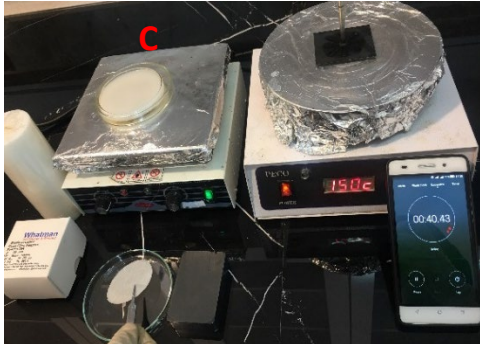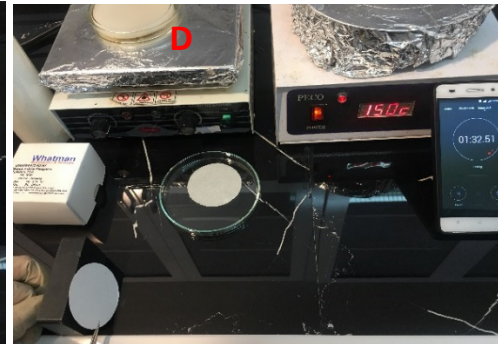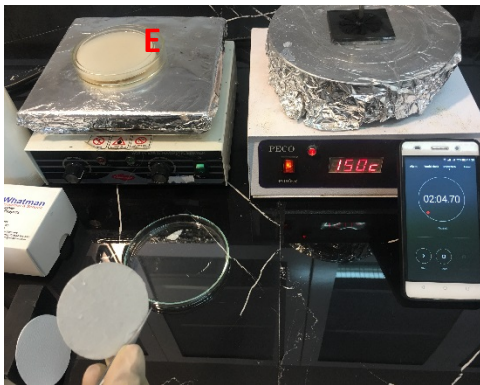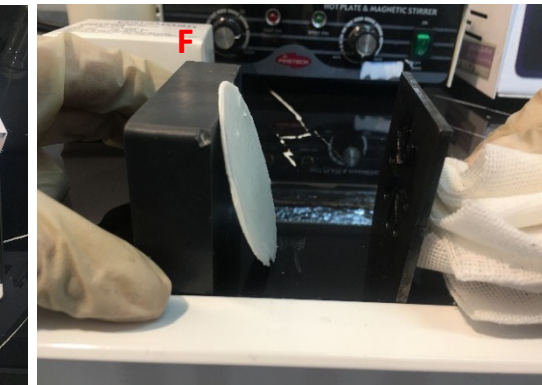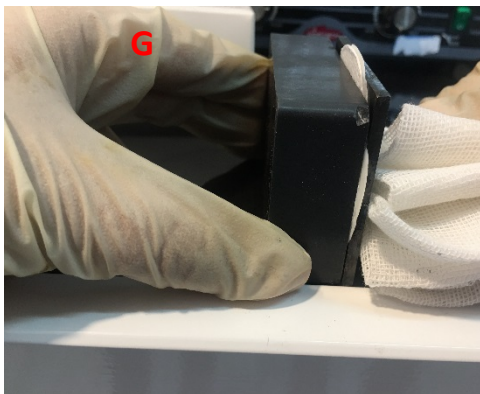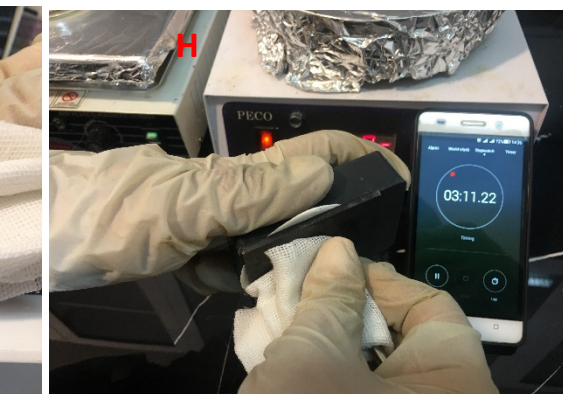

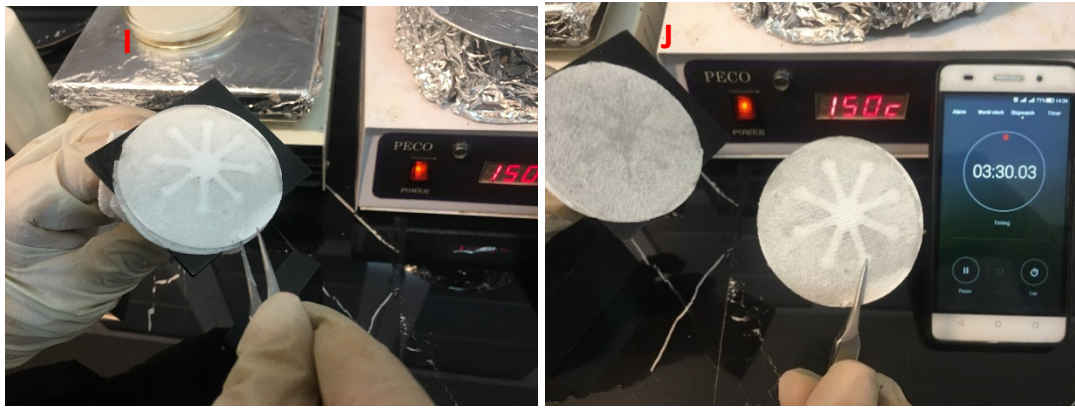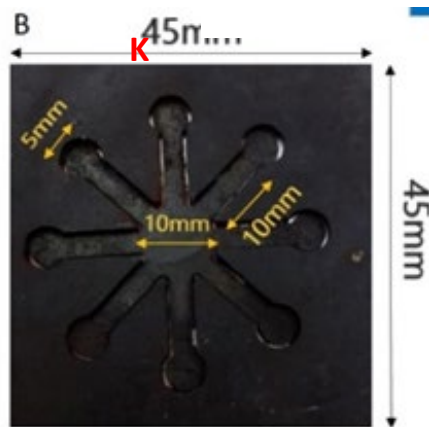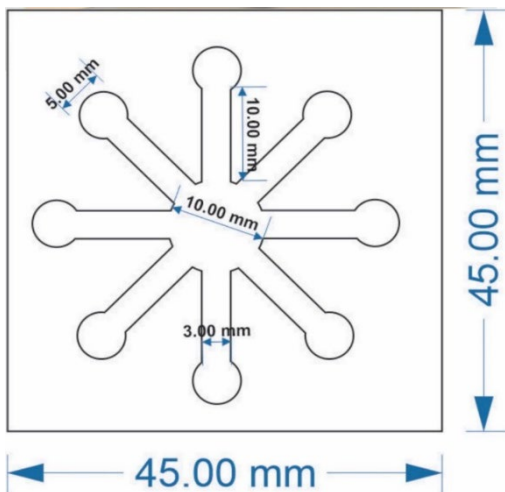

**Fig. S1.** The fabrication process of paper-based microfluidic device, A) Materials and equipment required B) Immersion of fiberglass paper in molten paraffin at 90 ° C, C) Dry paraffin-impregnated paper at room temperature, D) Place paraffin-free paper between paraffin-containing paper and a magnet, E) Place paraffin paper on the paraffin-free paper F) Place paraffin-free paper and paraffin-containing paper between the iron pattern and the magnet, G) Attract the pattern to the magnet H) Separation of pattern and magnet I) Formation of microfluidic channels in paraffin-free paper, J) Made paper-based microfluidic device K) Designed pattern size.

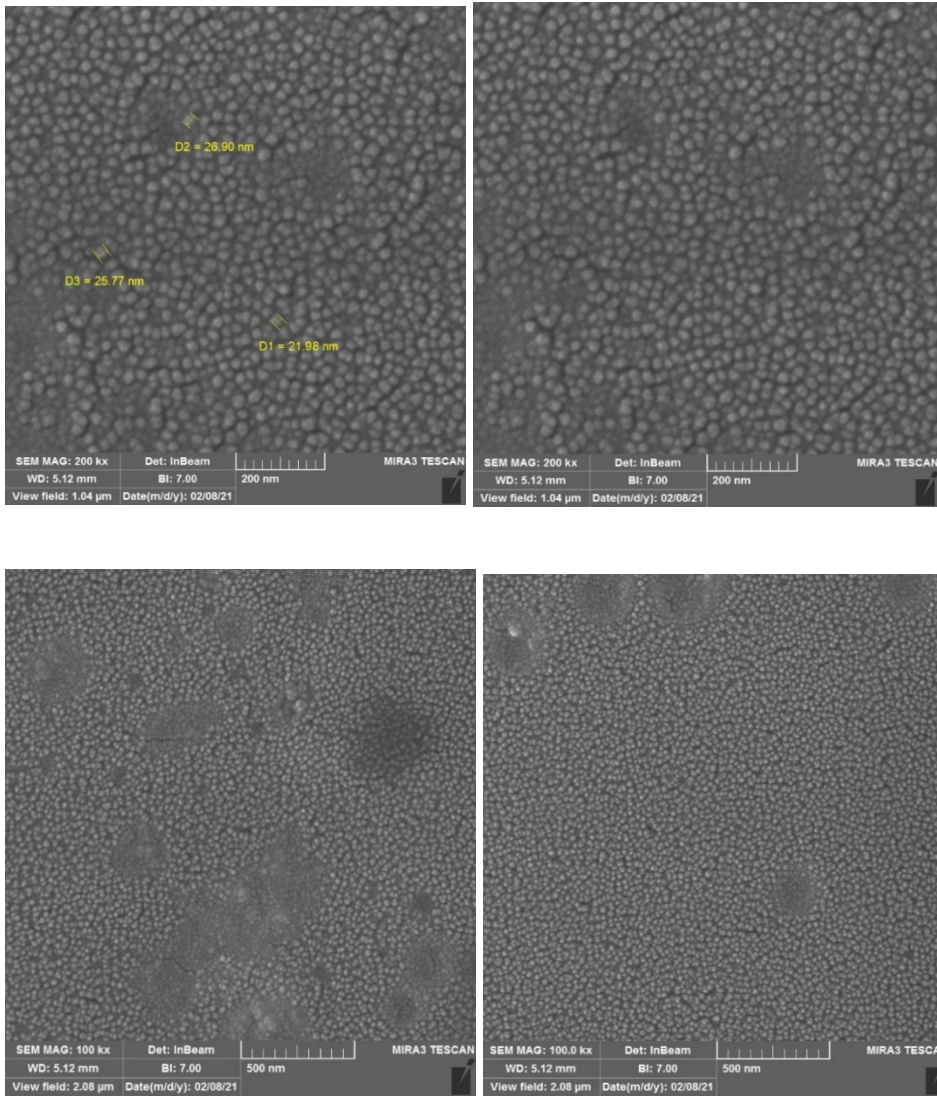

**Fig. S2.** FE-SEM images of AuNPs-CysA.



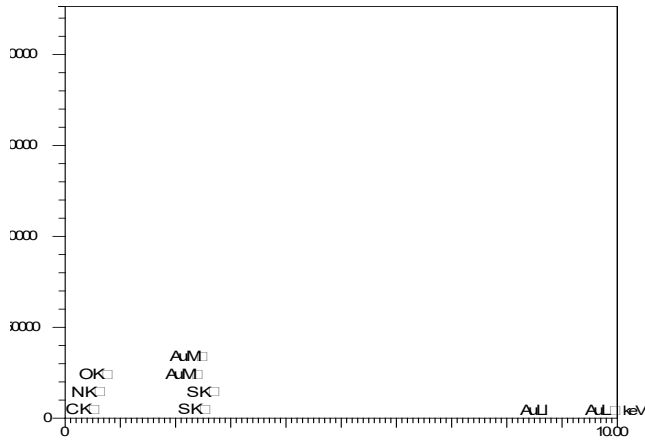

Fig. S3. EDS images of AuNPs-CysA.

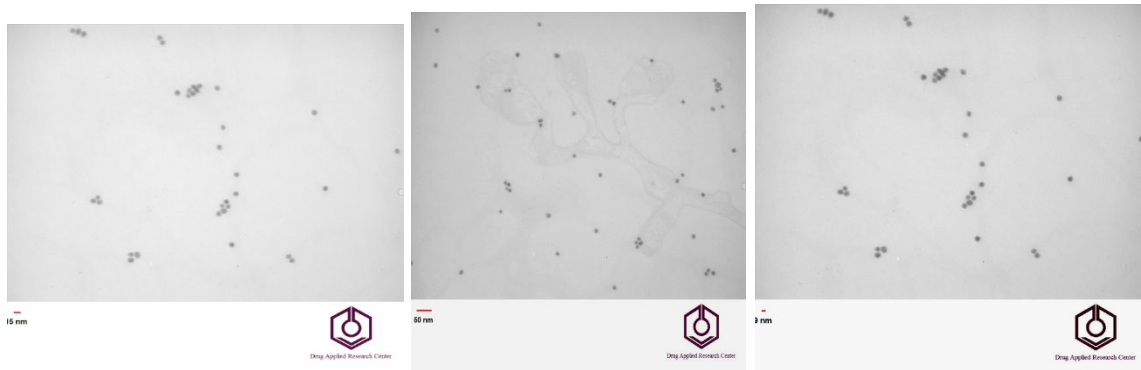

Fig. S4. TEM images of AuNPs-CysA.

|                                | <b>A</b>       | Size (d.n... | % Number: | St Dev (d.n... |
|--------------------------------|----------------|--------------|-----------|----------------|
| <b>Z-Average (d.nm):</b> 97.87 | <b>Peak 1:</b> | 15.38        | 100.0     | 3.722          |
| <b>PdI:</b> 0.641              | <b>Peak 2:</b> | 0.000        | 0.0       | 0.000          |
| <b>Intercept:</b> 0.615        | <b>Peak 3:</b> | 0.000        | 0.0       | 0.000          |

**Result quality Refer to quality report**

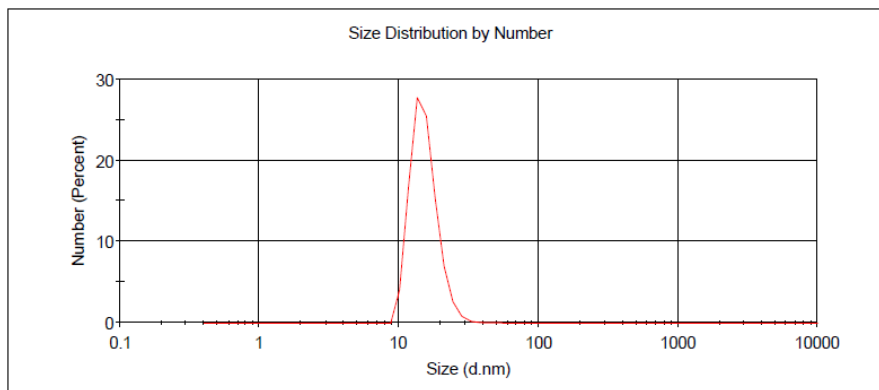

**Results**

**B**

|                                    | Mean (mV)            | Area (%) | St Dev (mV) |
|------------------------------------|----------------------|----------|-------------|
| <b>Zeta Potential (mV):</b> -25.0  | <b>Peak 1:</b> -16.4 | 93.1     | 6.55        |
| <b>Zeta Deviation (mV):</b> 43.8   | <b>Peak 2:</b> 5.22  | 6.9      | 4.21        |
| <b>Conductivity (mS/cm):</b> 0.269 | <b>Peak 3:</b> 0.00  | 0.0      | 0.00        |

**Result quality** See result quality report

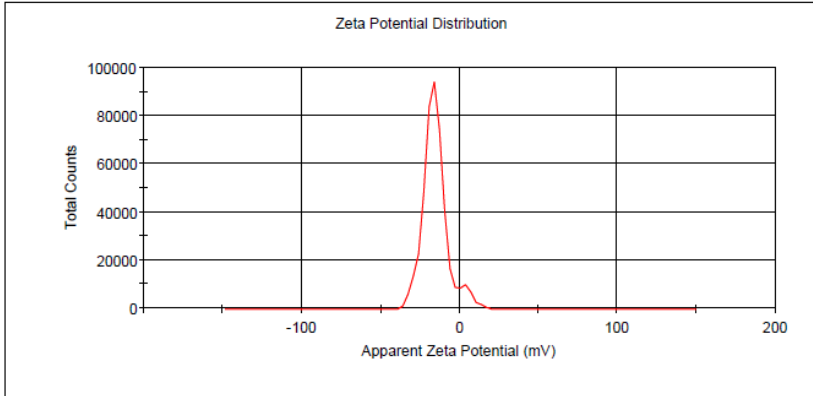

**C**

|                               | Size (d.n...         | % Number: | St Dev (d.n... |
|-------------------------------|----------------------|-----------|----------------|
| <b>Z-Average (d.nm):</b> 3969 | <b>Peak 1:</b> 2185  | 94.6      | 548.3          |
| <b>Pdl:</b> 0.292             | <b>Peak 2:</b> 5080  | 5.4       | 749.7          |
| <b>Intercept:</b> 0.766       | <b>Peak 3:</b> 0.000 | 0.0       | 0.000          |

**Result quality** Refer to quality report

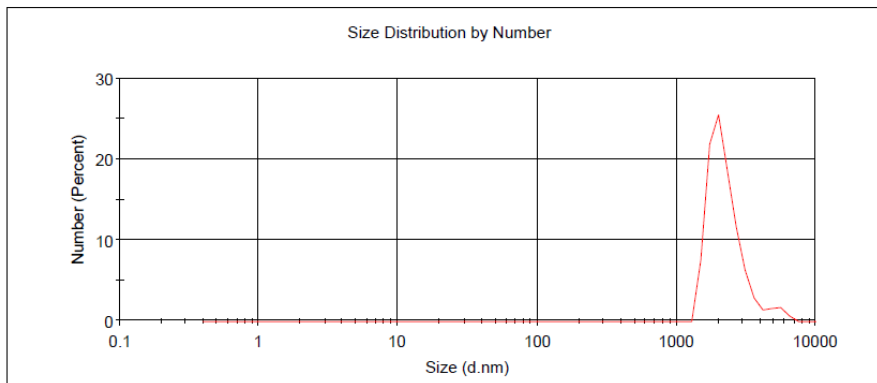

**Fig. S5** A) Size distribution analysis of AuNPs-CysA by DLS. B) Recorded Zp for synthesized AuNPs-CysA, C) Size distribution analysis of AuNPs-CysA combined with UA.

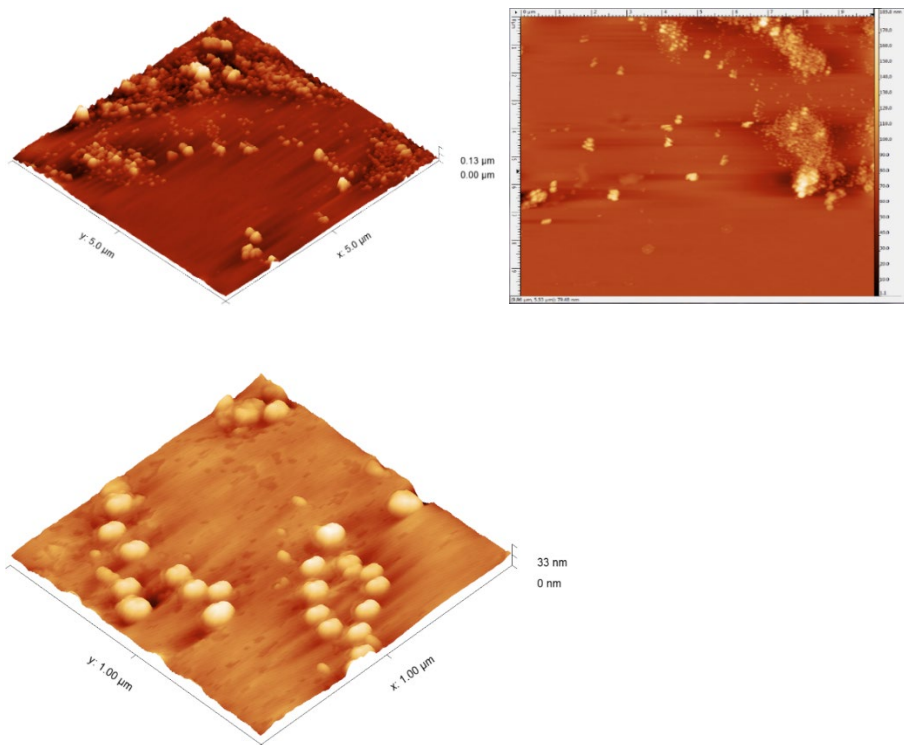

**Fig. S6.** AFM images of AuNPs-CysA.

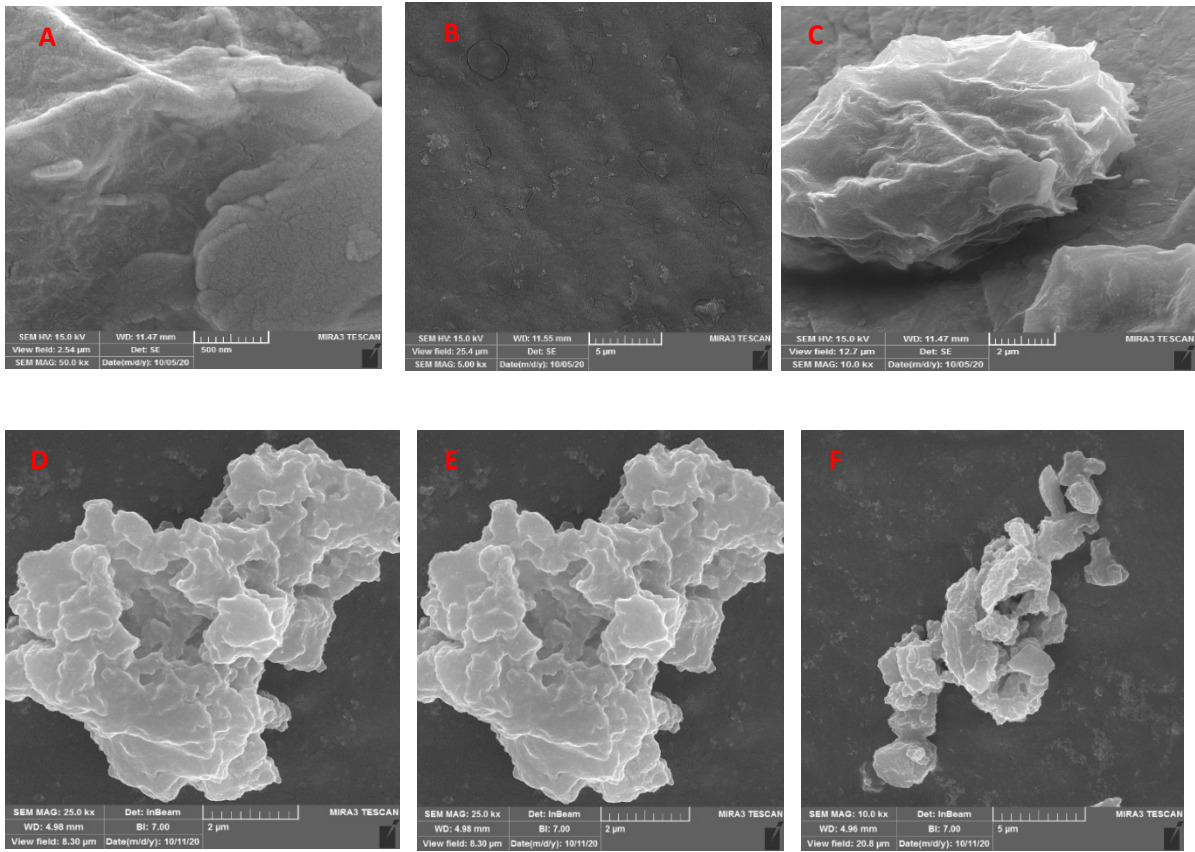

**Fig. S7.** A-C) FE-SEM images of AuNFs synthesized in pH = 6.15, D-F) pH = 4.19 in different magnification, respectively.

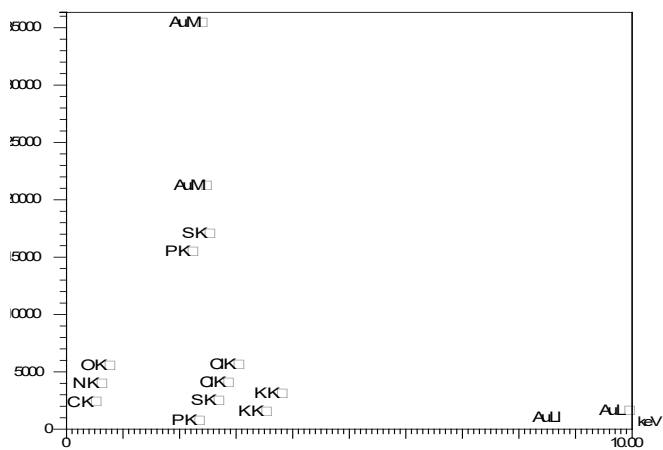

**Fig. S8.** EDC images of AuNFs.



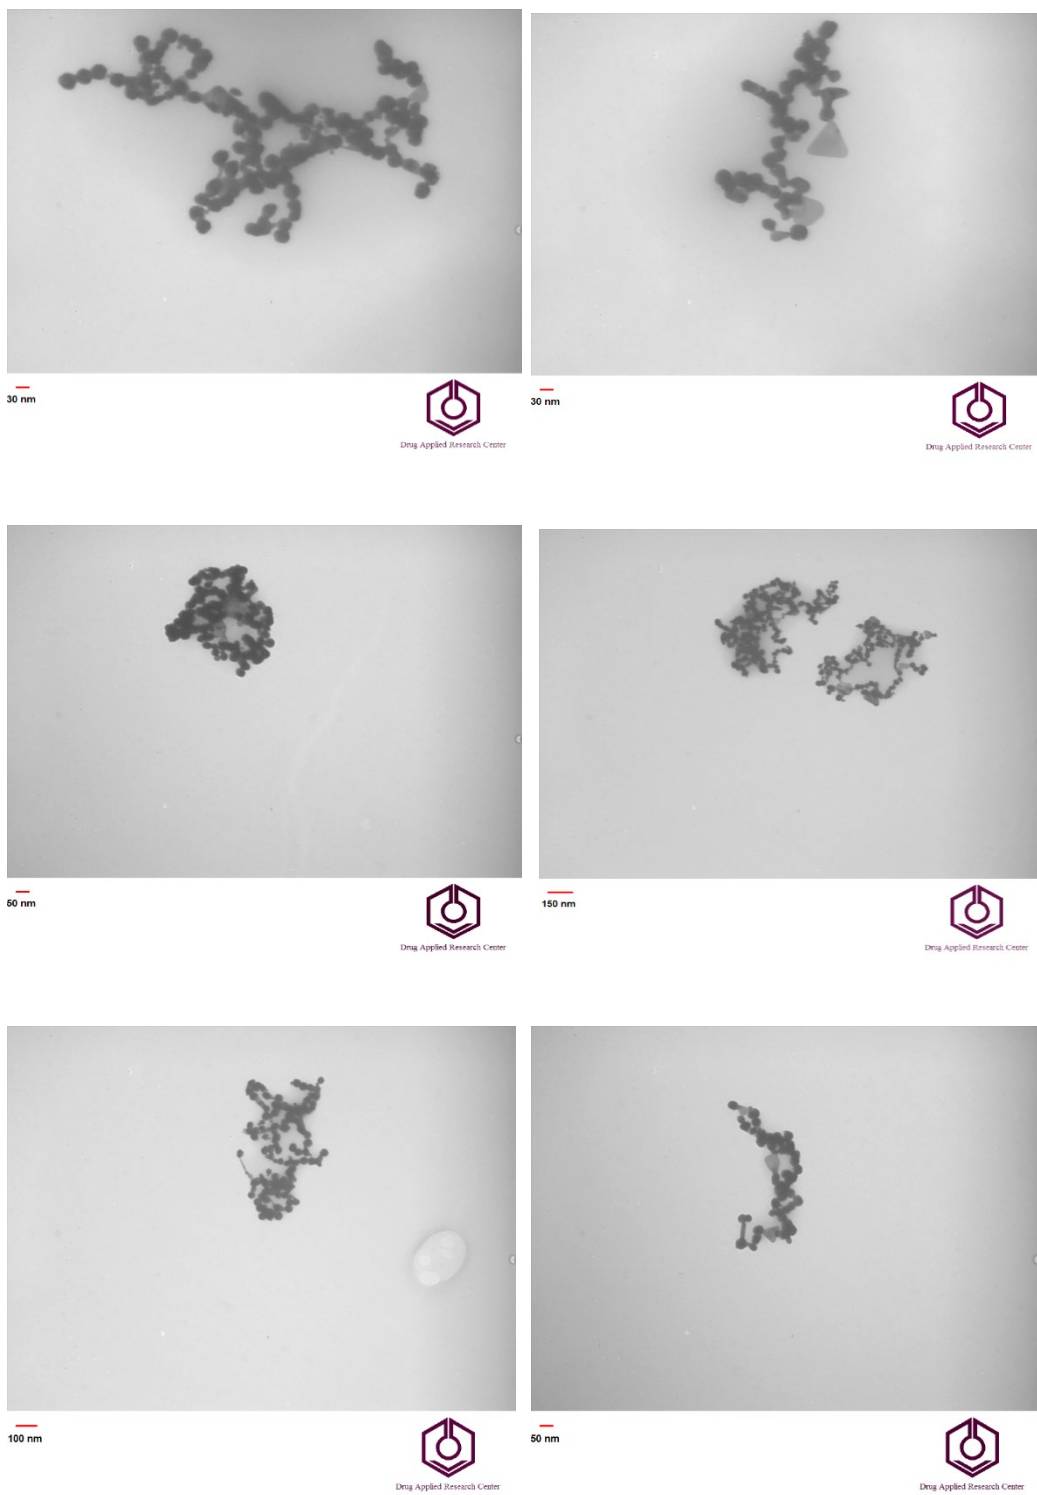

**Fig. S9.** TEM images of AuNFs.

Results

**A**

|                                | Size (d.n...         | % Number: | St Dev (d.n... |
|--------------------------------|----------------------|-----------|----------------|
| <b>Z-Average (d.nm):</b> 303.2 | <b>Peak 1:</b> 150.1 | 100.0     | 113.9          |
| <b>Pdl:</b> 0.340              | <b>Peak 2:</b> 0.000 | 0.0       | 0.000          |
| <b>Intercept:</b> 0.768        | <b>Peak 3:</b> 0.000 | 0.0       | 0.000          |

Result quality **Refer to quality report**

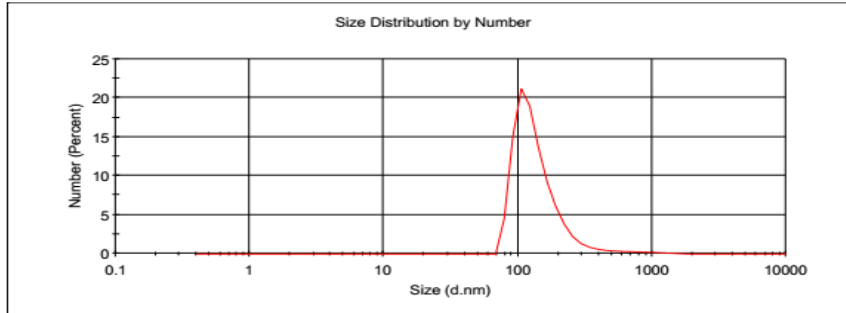

Results

**B**

|                                | Size (d.n...         | % Number: | St Dev (d.n... |
|--------------------------------|----------------------|-----------|----------------|
| <b>Z-Average (d.nm):</b> 94.31 | <b>Peak 1:</b> 71.86 | 0.0       | 24.77          |
| <b>Pdl:</b> 0.316              | <b>Peak 2:</b> 11.33 | 100.0     | 2.574          |
| <b>Intercept:</b> 0.820        | <b>Peak 3:</b> 0.000 | 0.0       | 0.000          |

Result quality **Refer to quality report**

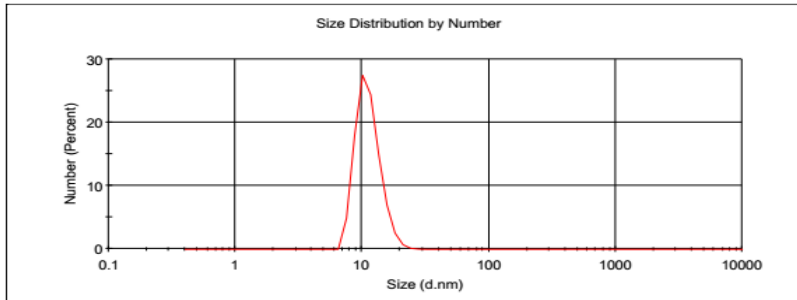

**C**

|                               | Size (d.nm):         | % Volume: | St Dev (d.nm): |
|-------------------------------|----------------------|-----------|----------------|
| <b>Z-Average (d.nm):</b> 2816 | <b>Peak 1:</b> 3232  | 100.0     | 998.3          |
| <b>Pdl:</b> 0.015             | <b>Peak 2:</b> 0.000 | 0.0       | 0.000          |
| <b>Intercept:</b> 0.724       | <b>Peak 3:</b> 0.000 | 0.0       | 0.000          |

Result quality **Refer to quality report**

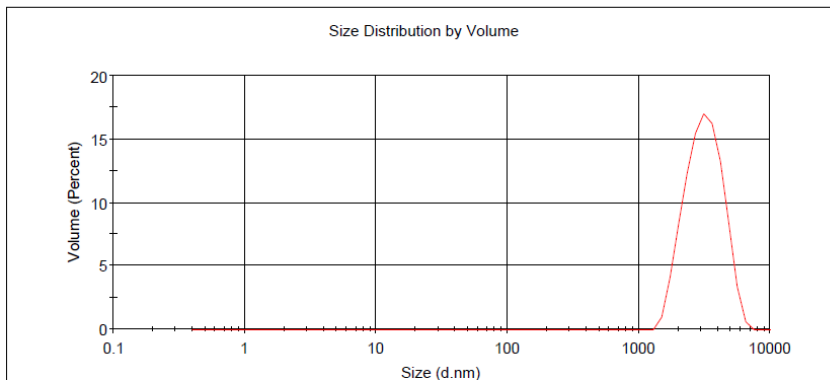

|                               |                                |                      |                     |                       |
|-------------------------------|--------------------------------|----------------------|---------------------|-----------------------|
|                               | <b>D</b>                       | <b>Size (d.n...</b>  | <b>% Intensity:</b> | <b>St Dev (d.n...</b> |
| <b>Z-Average (d.nm):</b> 1736 |                                | <b>Peak 1:</b> 1578  | 100.0               | 365.8                 |
| <b>Pdl:</b> 0.322             |                                | <b>Peak 2:</b> 0.000 | 0.0                 | 0.000                 |
| <b>Intercept:</b> 0.766       |                                | <b>Peak 3:</b> 0.000 | 0.0                 | 0.000                 |
| <b>Result quality</b>         | <b>Refer to quality report</b> |                      |                     |                       |

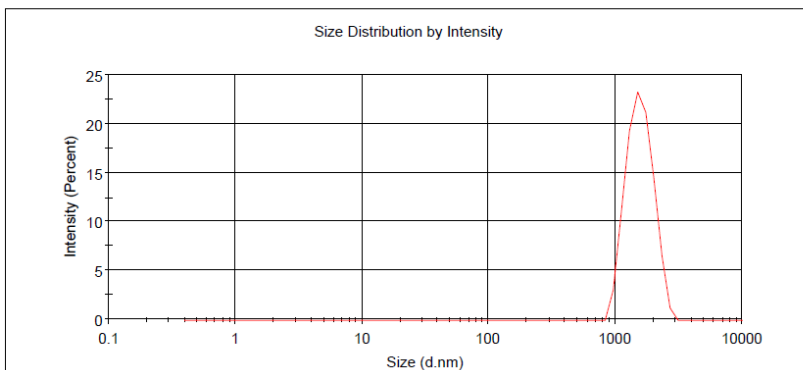

|                                    |             |                     |                 |                    |
|------------------------------------|-------------|---------------------|-----------------|--------------------|
|                                    | <b>E</b>    | <b>Mean (mV)</b>    | <b>Area (%)</b> | <b>St Dev (mV)</b> |
| <b>Zeta Potential (mV):</b> 23.9   |             | <b>Peak 1:</b> 23.9 | 100.0           | 4.80               |
| <b>Zeta Deviation (mV):</b> 4.80   |             | <b>Peak 2:</b> 0.00 | 0.0             | 0.00               |
| <b>Conductivity (mS/cm):</b> 0.368 |             | <b>Peak 3:</b> 0.00 | 0.0             | 0.00               |
| <b>Result quality</b>              | <b>Good</b> |                     |                 |                    |

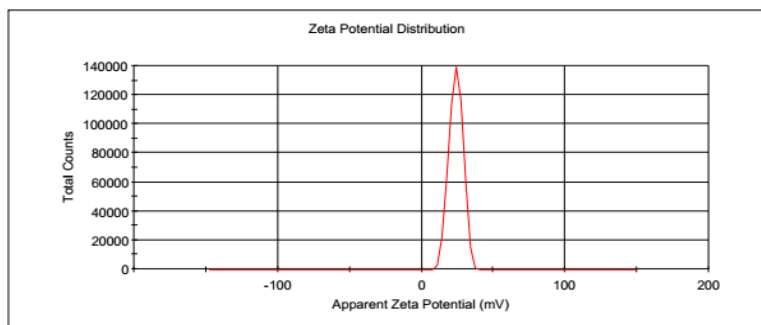

|                                    |             |                      |                 |                    |
|------------------------------------|-------------|----------------------|-----------------|--------------------|
|                                    | <b>F</b>    | <b>Mean (mV)</b>     | <b>Area (%)</b> | <b>St Dev (mV)</b> |
| <b>Zeta Potential (mV):</b> -9.31  |             | <b>Peak 1:</b> -9.31 | 100.0           | 4.65               |
| <b>Zeta Deviation (mV):</b> 4.65   |             | <b>Peak 2:</b> 0.00  | 0.0             | 0.00               |
| <b>Conductivity (mS/cm):</b> 0.492 |             | <b>Peak 3:</b> 0.00  | 0.0             | 0.00               |
| <b>Result quality</b>              | <b>Good</b> |                      |                 |                    |

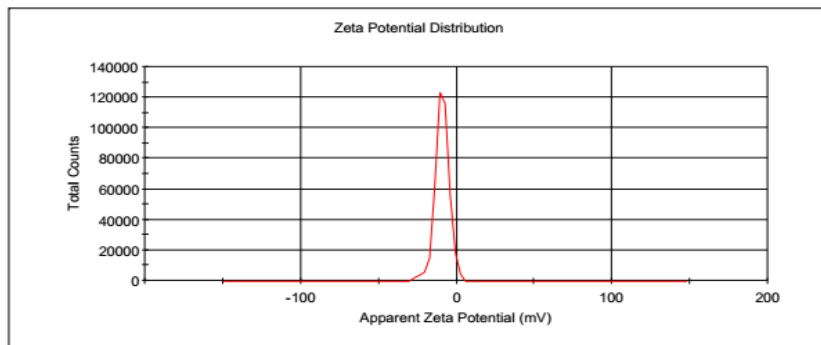

**Fig. S10. A-B) Size distribution analysis of AuNFs C-D) Size distribution analysis of AuNFs after the combination with UA by DLS E-F) Recorded Zp for synthesized AuNFs in the pH = 4.91 and pH = 6.15, respectively.**

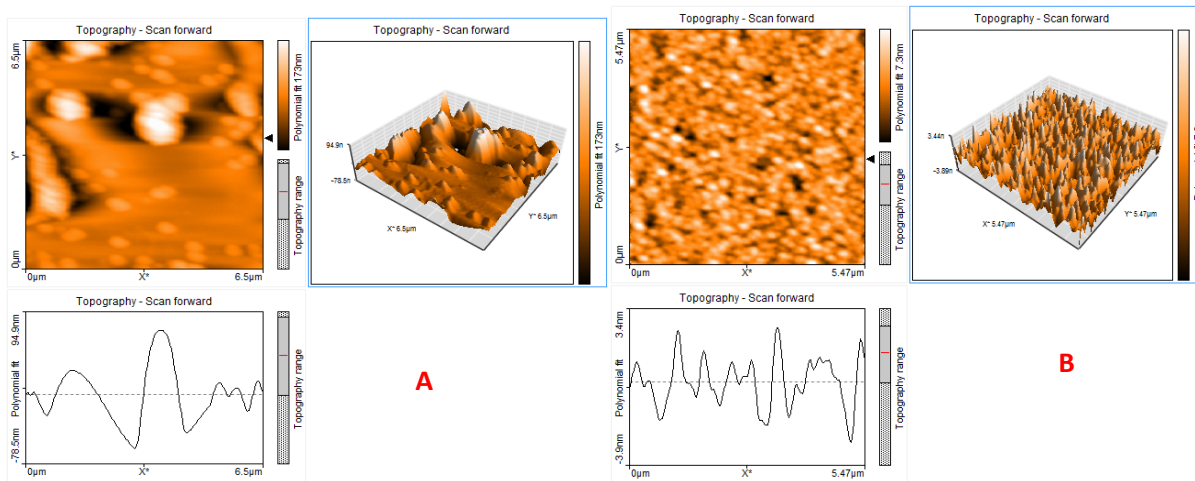

**Fig. S11. A-B)** AFM images of synthesized AuNFs prepared in the pH of 4.91 and 6.15, respectively.

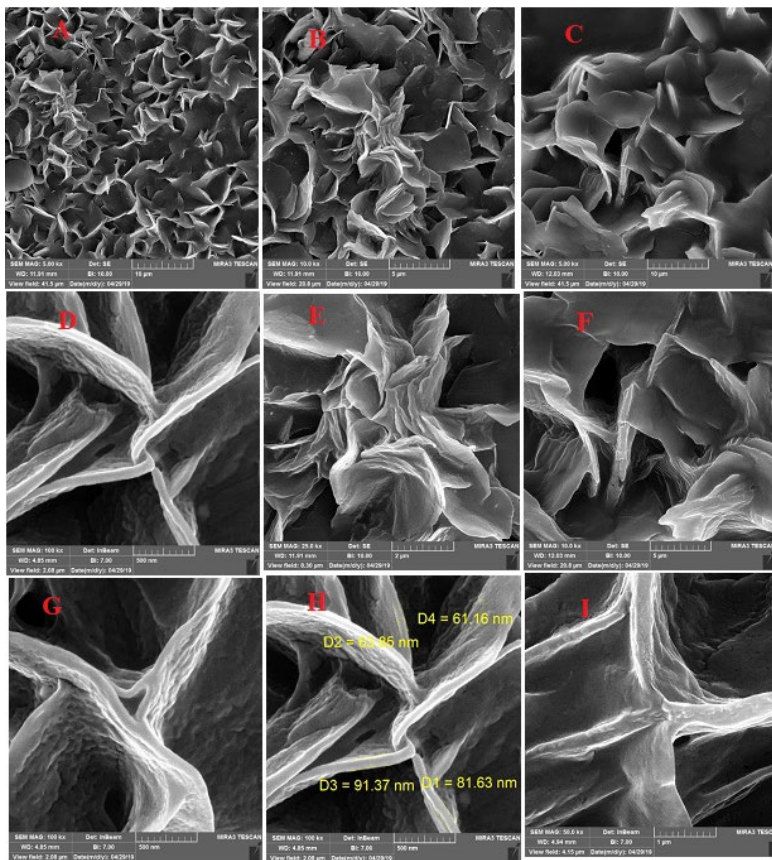

**Fig. S12.** FE-SEM images of GNSs in different magnification.

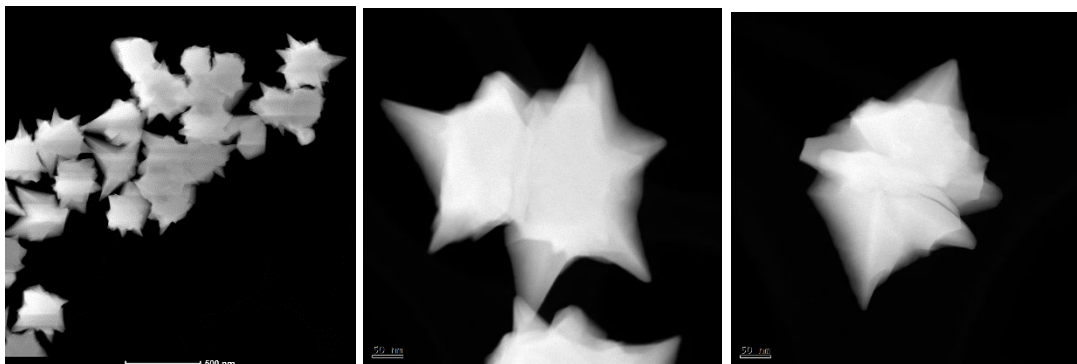

**Fig. S13.** TEM images of GNSs in various magnification.



Results

**A**

|                                | Size (d.n...         | % Number: | St Dev (d.n... |
|--------------------------------|----------------------|-----------|----------------|
| <b>Z-Average (d.nm):</b> 135.5 | <b>Peak 1:</b> 24.61 | 100.0     | 6.831          |
| <b>Pdl:</b> 0.393              | <b>Peak 2:</b> 0.000 | 0.0       | 0.000          |
| <b>Intercept:</b> 0.649        | <b>Peak 3:</b> 0.000 | 0.0       | 0.000          |

**Result quality** Good

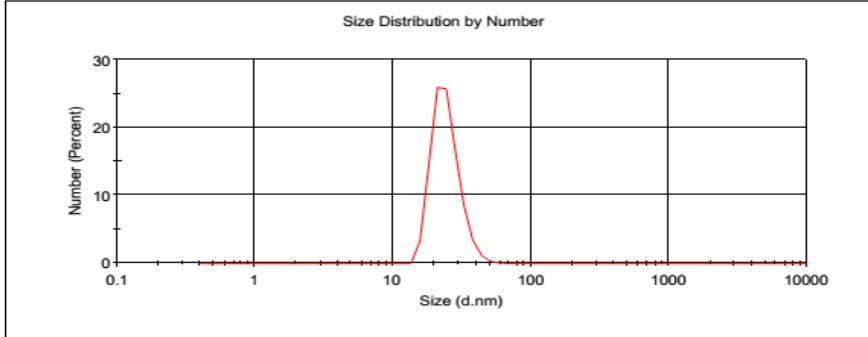

-----

|                                | Size (d.n... <b>B</b> | % Number: | St Dev (d.n... |
|--------------------------------|-----------------------|-----------|----------------|
| <b>Z-Average (d.nm):</b> 930.3 | <b>Peak 1:</b> 430.1  | 0.2       | 73.05          |
| <b>Pdl:</b> 0.616              | <b>Peak 2:</b> 59.31  | 99.8      | 9.318          |
| <b>Intercept:</b> 0.841        | <b>Peak 3:</b> 0.000  | 0.0       | 0.000          |

**Result quality** Refer to quality report

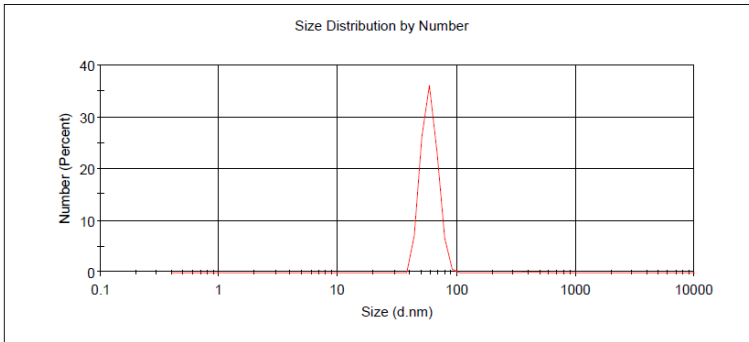

**Results**

**C**

|                                                 | Mean (mV)           | Area (%) | St Dev (mV) |
|-------------------------------------------------|---------------------|----------|-------------|
| <b>Zeta Potential (mV):</b> 42.6                | <b>Peak 1:</b> 86.1 | 92.2     | 18.2        |
| <b>Zeta Deviation (mV):</b> 115                 | <b>Peak 2:</b> 133  | 4.6      | 4.39        |
| <b>Conductivity (mS/cm):</b> 1.81               | <b>Peak 3:</b> 143  | 2.5      | 3.45        |
| <b>Result quality</b> See result quality report |                     |          |             |

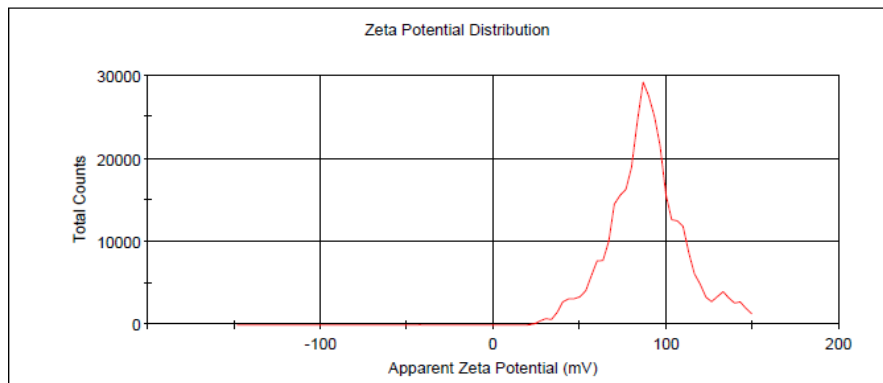

*Fig. S14. A) Size distribution analysis of GNSs B) Size distribution analysis of GNSs with UA by DLS C) Recorded Zp for synthesized GNSs.*

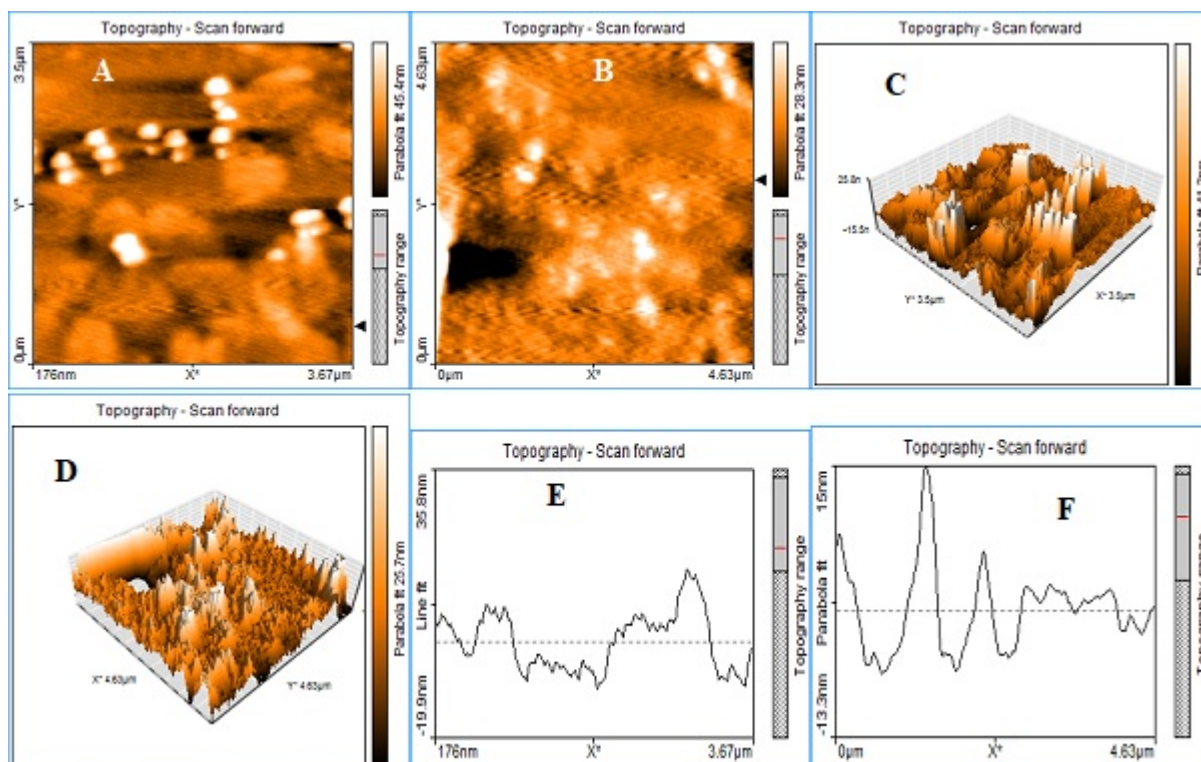

*Fig. S15. AFM imaging of synthesized GNSs after covering on the slide.*

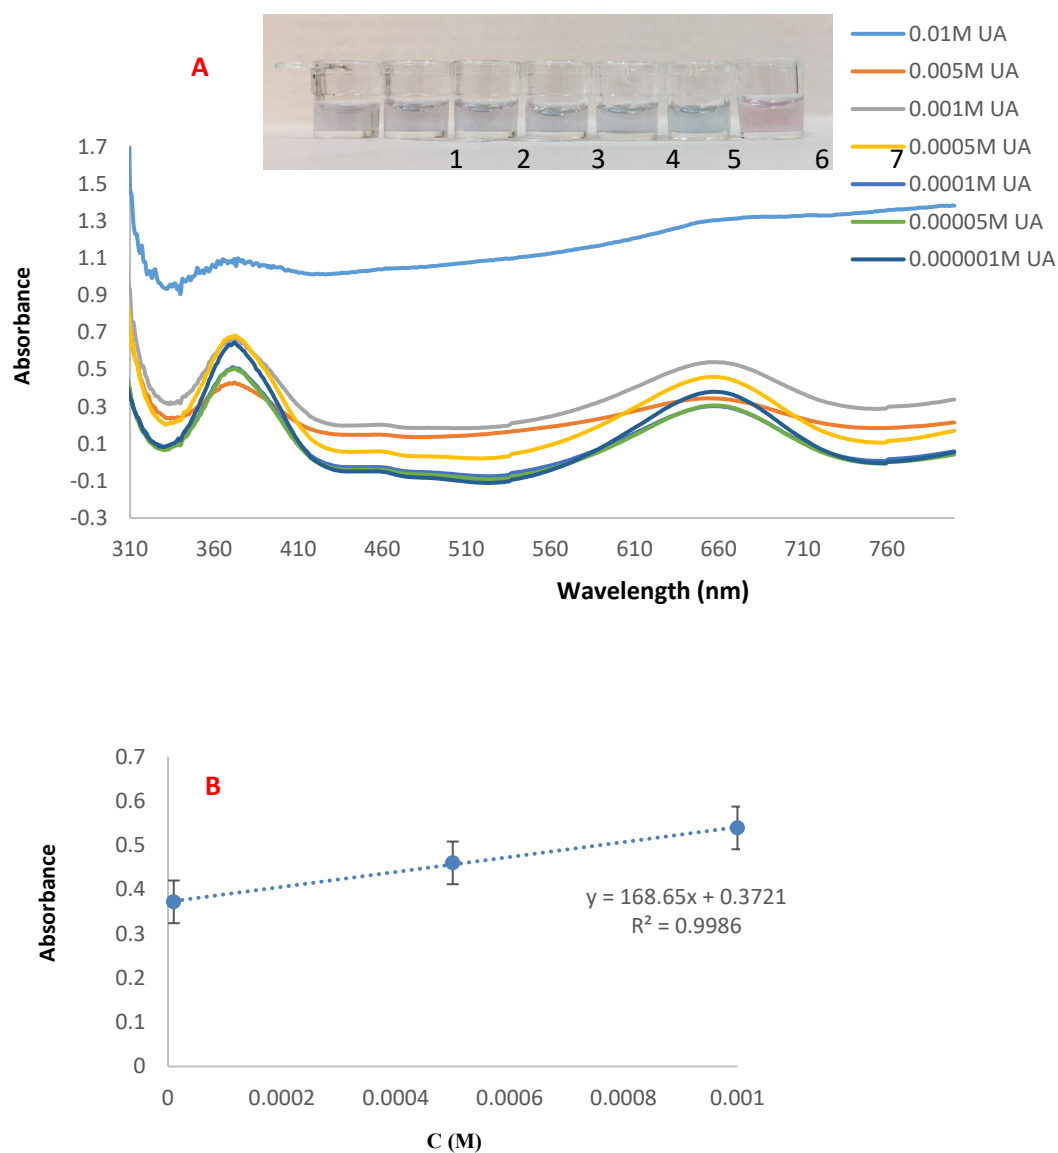

**Fig. S16. A)** Photographic image and UV-Vis spectra recorded from reaction systems containing AuNPs-CysA, (TMB+H<sub>2</sub>O<sub>2</sub>+Met) and different concentration of UA (0.01, 0.005, 0.001, 0.0005, 0.0001, 0.00005 and 0.000001 M), **B)** Calibration curve of peak intensity versus concentration of UA.

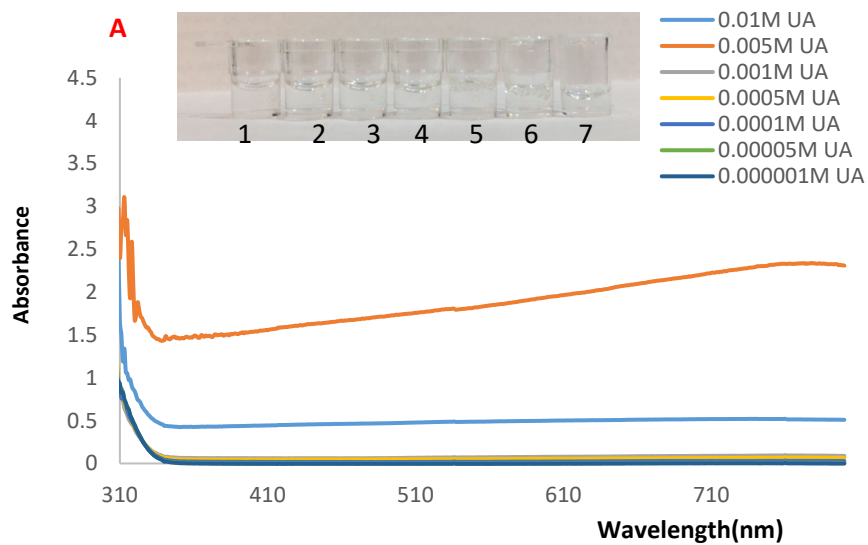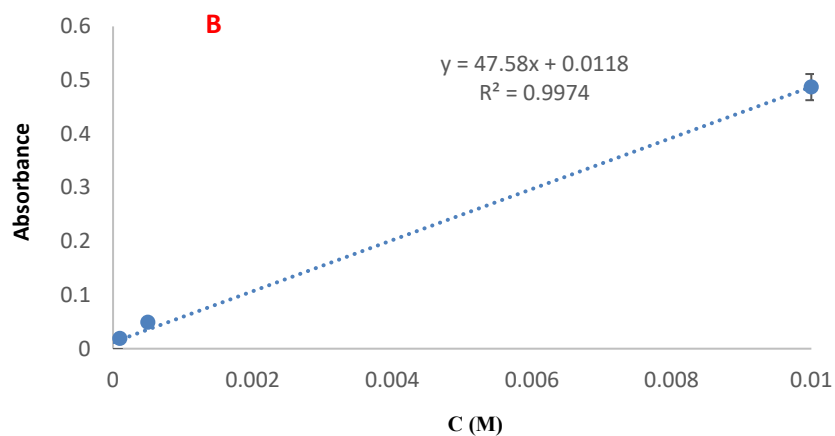

**Fig. S17. A)** Photographic image and UV-Vis spectra recorded from reaction systems containing GNSs, (TMB+H<sub>2</sub>O<sub>2</sub>+Met) and different concentration of UA (0.01, 0.005, 0.001, 0.0005, 0.0001, 0.00005 and 0.000001 M), **B)** Calibration curve of peak intensity versus concentration of UA.

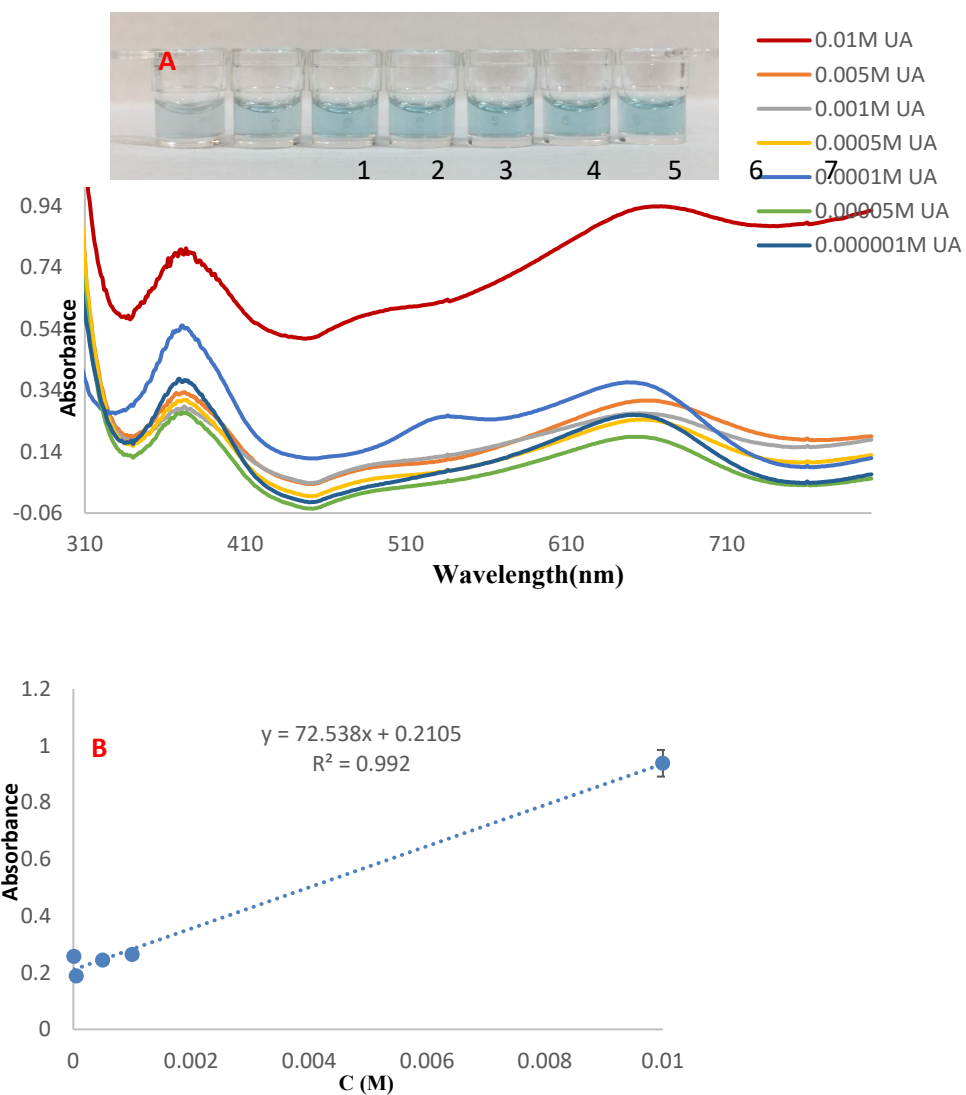

**Fig. S18. A)** Photographic image and UV-Vis spectra recorded from reaction systems containing AuNFs ( $Ph = 4.91$ ) ( $TMB+H_2O_2+Met$ ) and different concentration of UA (0.01, 0.005, 0.001, 0.0005, 0.0001, 0.00005 and 0.000001 M), **B)** Calibration curve of peak intensity versus concentration of UA.



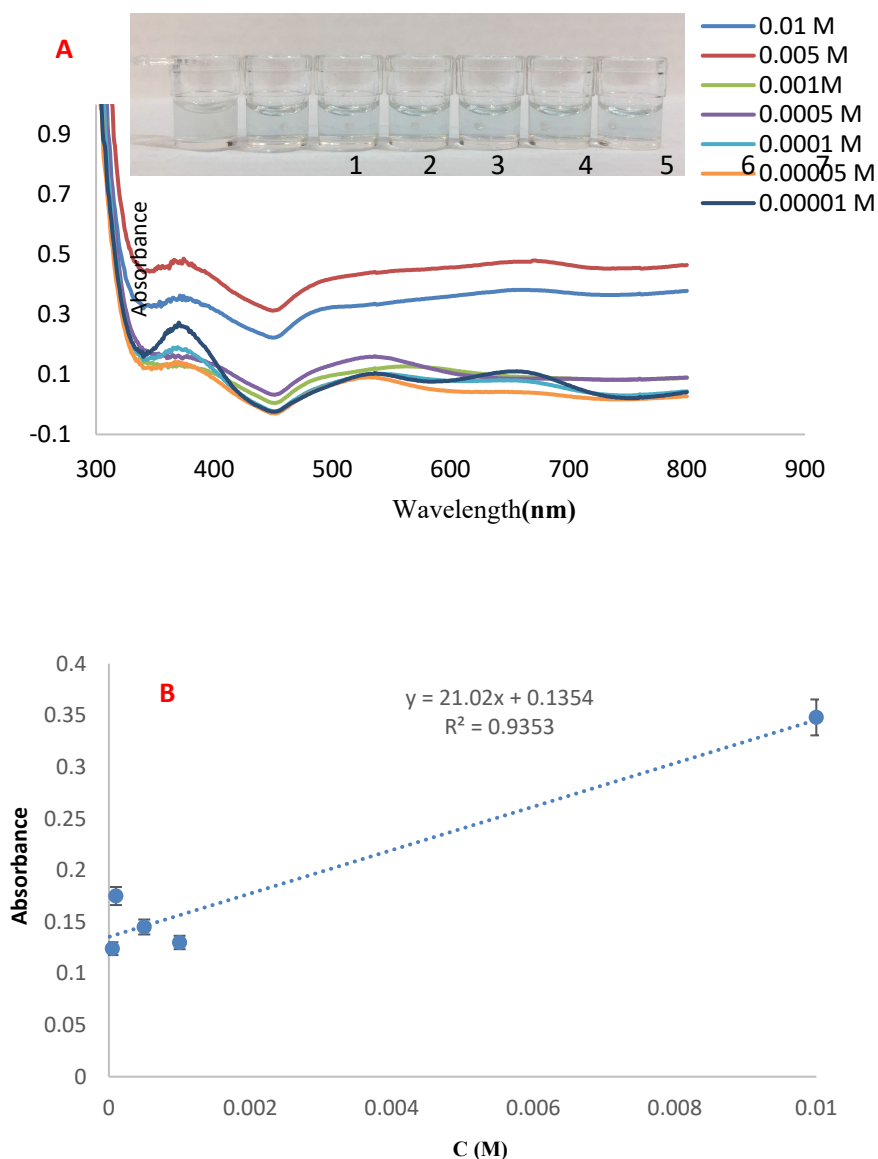

**Fig. S19. A)** Photographic image and UV-Vis spectra recorded from reaction systems containing AuNFs ( $pH = 6.15$ ) ( $TMB+H_2O_2+Met$ ) and different concentration of UA (0.01, 0.005, 0.001, 0.0005, 0.0001, 0.00005 and 0.000001 M), **B)** Calibration curve of peak intensity versus concentration of UA.

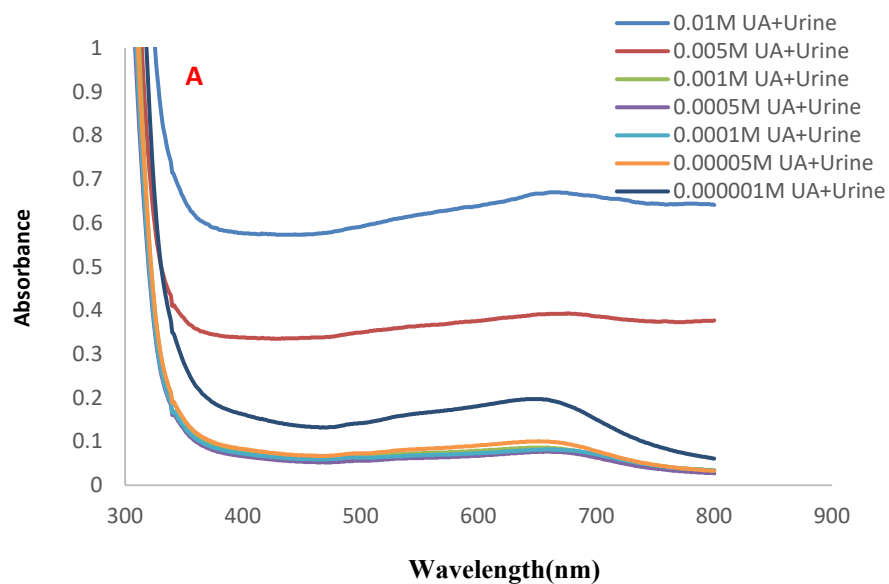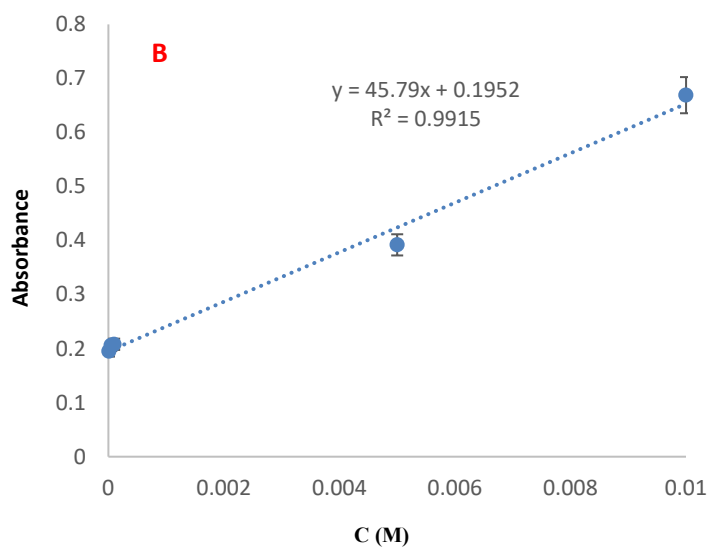

**Fig. S20. A)** Absorption response for UA with increasing concentrations (0.00005 to 0.01 M) and AuNPs-CysA in human urine specimens, **B)** Calibration plot of peak intensity versus concentration of UA.

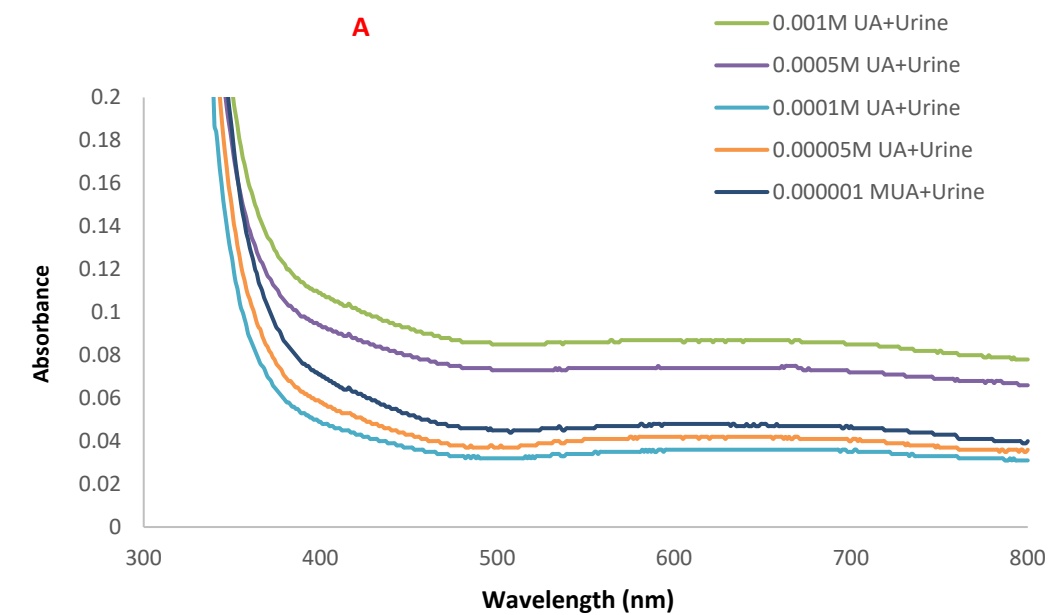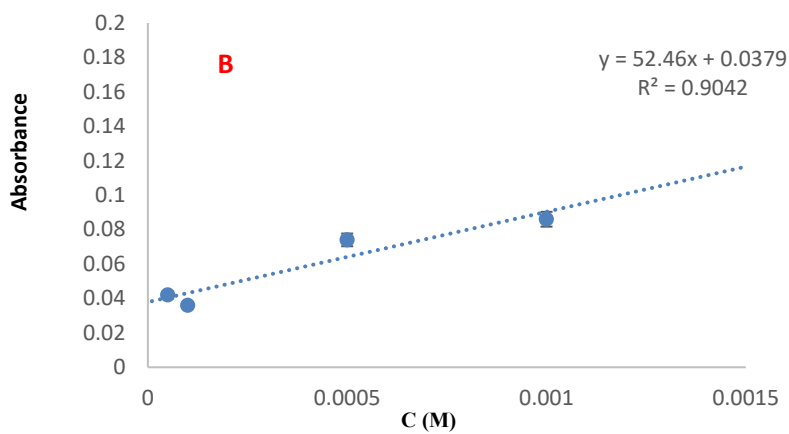

**Fig. S21. A)** Absorption response for UA with increasing concentrations (0.000001 to 0.001 M) and GNSs in human urine specimens, **B)** Calibration plot of peak intensity versus concentration of UA.

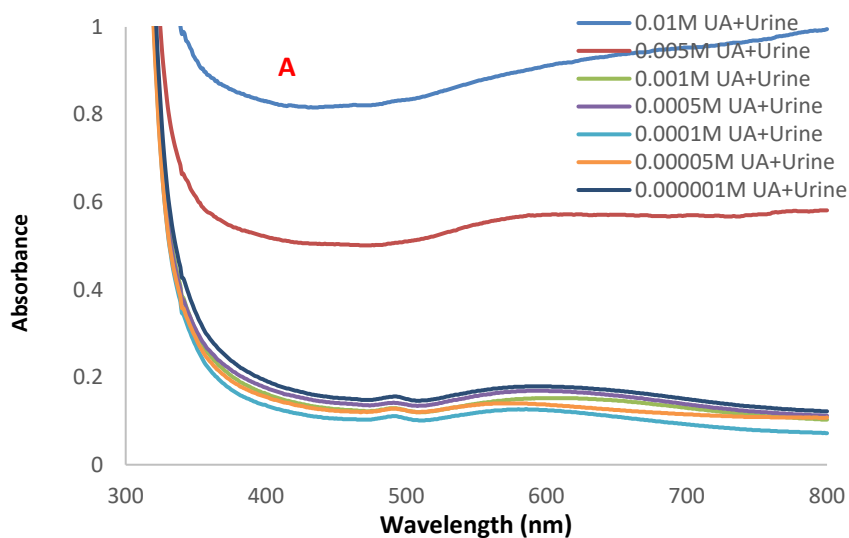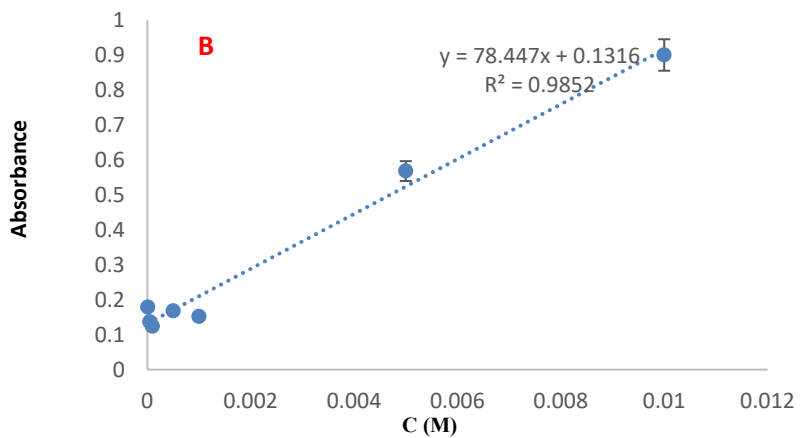

**Fig. S22.** **A)** Absorption response for UA with increasing concentrations (0.000001 to 0.01 M) and AuNFs pH=4.91 in human urine specimens, **B)** Calibration plot of peak intensity versus concentration of UA.

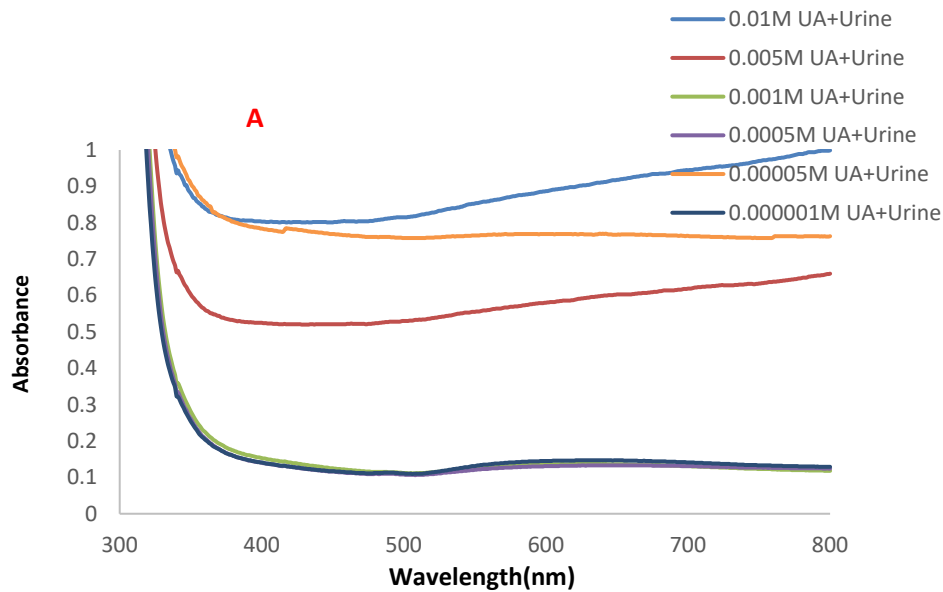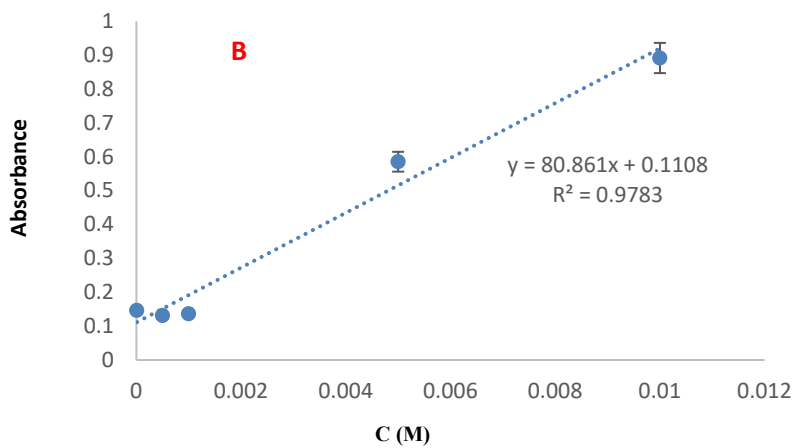

**Fig. S23.** *A)* Absorption response for UA with increasing concentrations (0.000001 to 0.01 M) and AuNFs pH=6.15 in human urine specimens, *B)* Calibration plot of peak intensity versus concentration of UA.



**Table S1.** Analytical Figure of merits.

| Type of AuNPs             | Linear range (M)                | LLOQ(M)            |
|---------------------------|---------------------------------|--------------------|
| AuNPs-CysA                | $10^{-6}$ to $10^{-3}$          | $10^{-6}$          |
| GNSs                      | $10^{-4}$ to $10^{-2}$          | $10^{-4}$          |
| AuNFs prepared in pH=4.91 | $10^{-6}$ to $10^{-2}$          | $10^{-6}$          |
| AuNFs prepared in pH=6.15 | $5 \times 10^{-5}$ to $10^{-2}$ | $5 \times 10^{-5}$ |
